# Supplementary figures and images for: Preventive and therapeutic effects of nitrite supplementation in experimental inflammatory bowel disease
Source: PubMed Central journal article supplement — Redox Biol. 2013 Dec 24;2:73–81. doi: 10.1016/j.redox.2013.12.012 (PMC3909265; doi:10.1016/j.redox.2013.12.012), 2013-12-24

# Supplemental Figures

## Fig S1

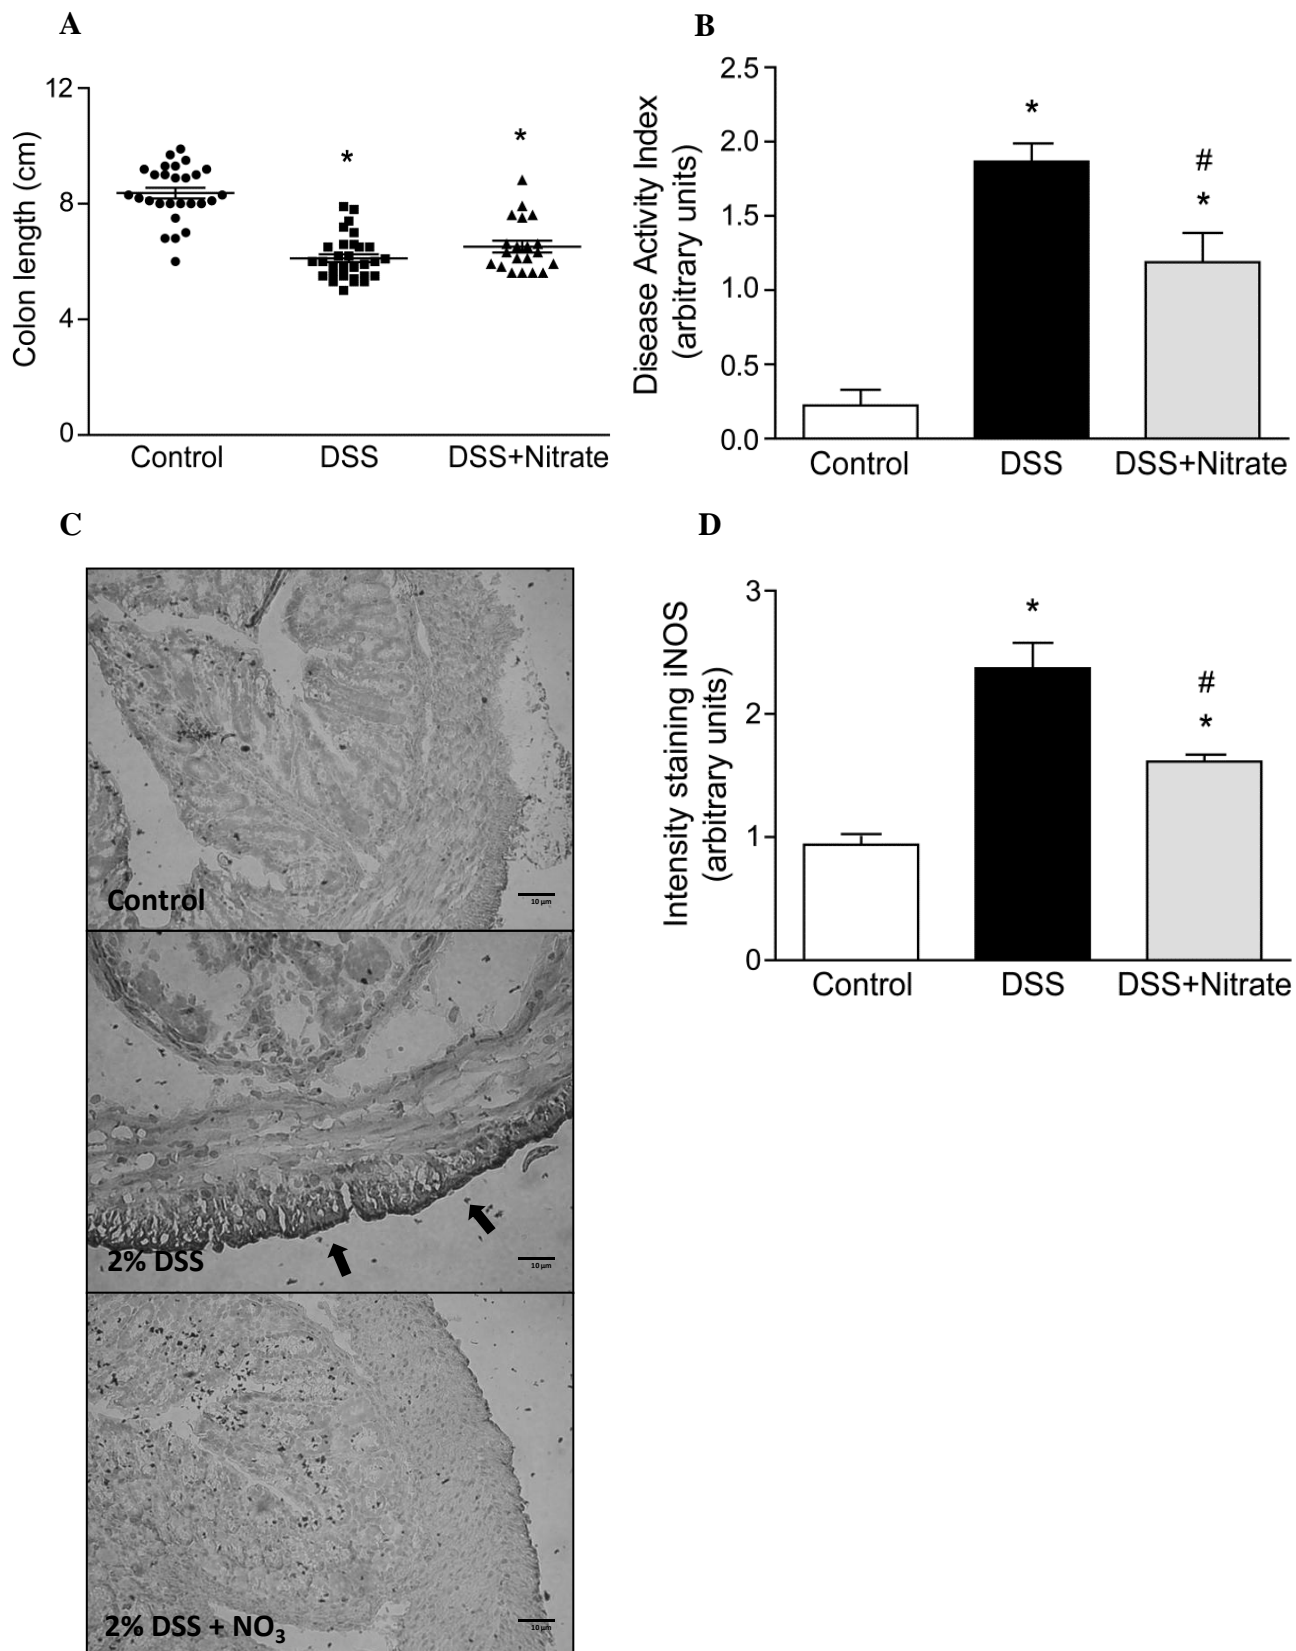

**E**

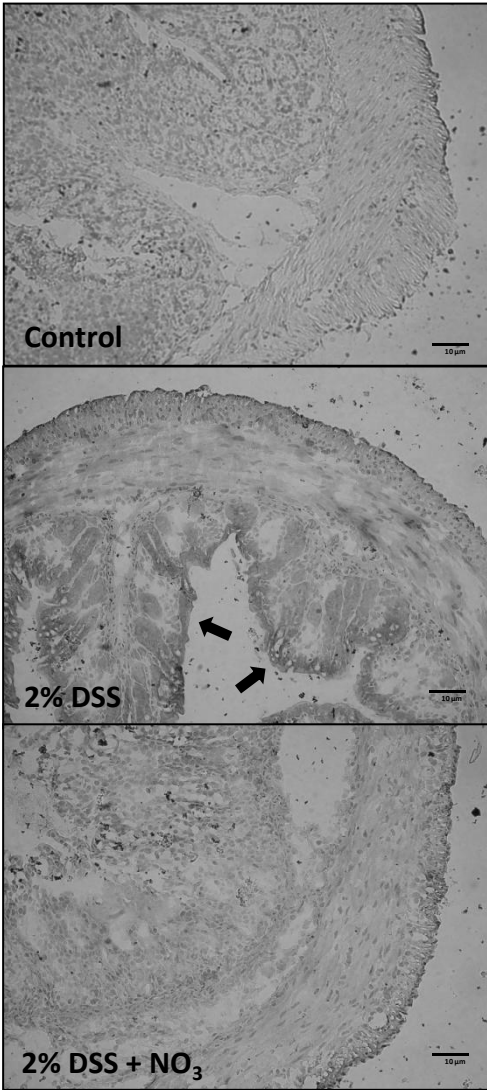

**F**

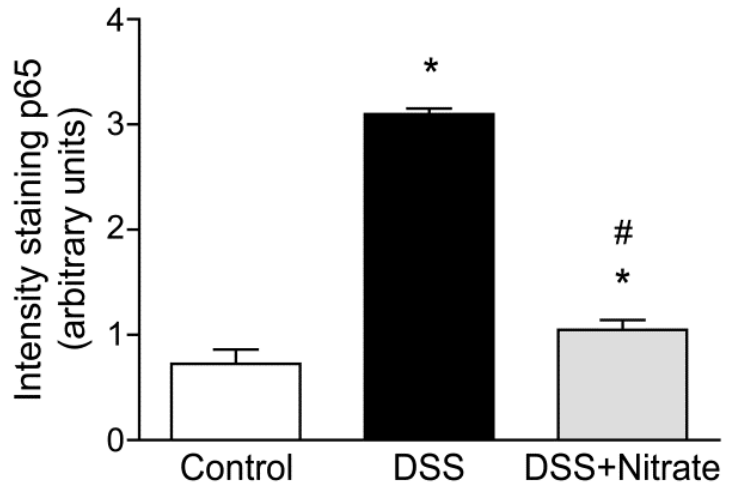

**Fig S2**

**A**

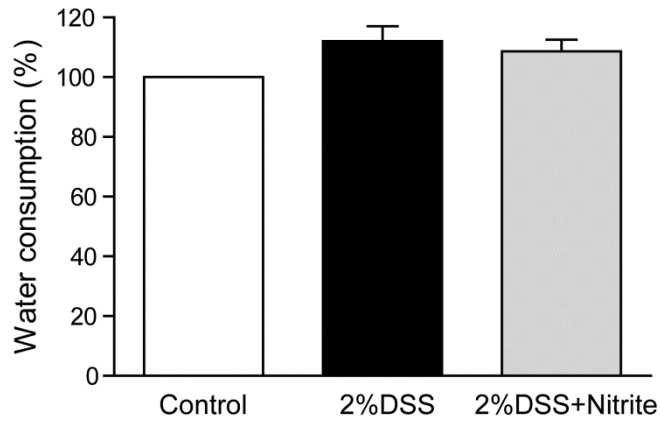

**B**

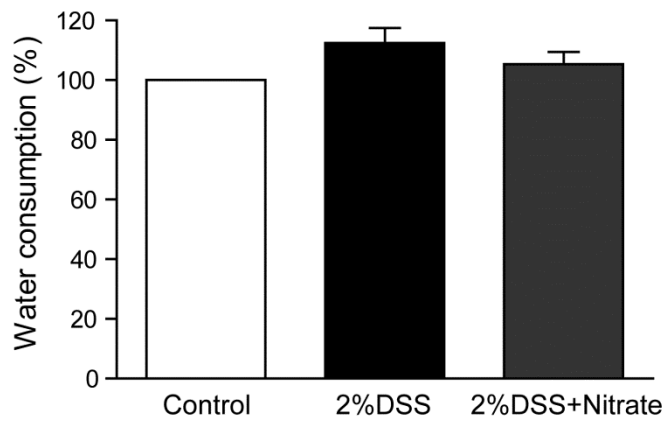

**C**

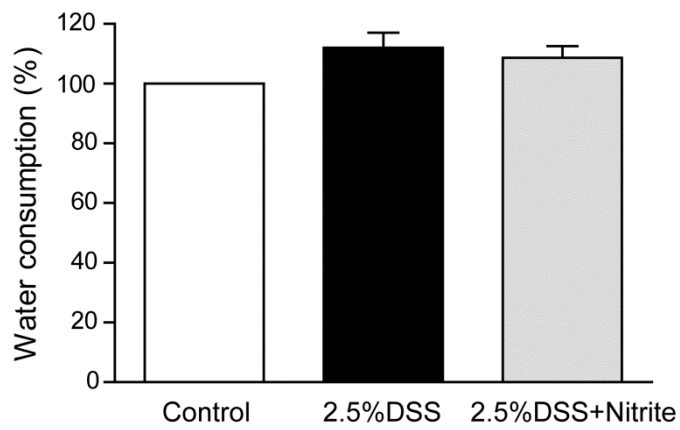

Supplement: mmc1.pdf [file mmc1.pdf]
